# Type of Mask May Impact on Continuous Positive Airway Pressure Adherence in Apneic Patients

Jean Christian Borel<sup>3\*</sup>, Renaud Tamisier<sup>1,2</sup>, Sonia Dias-Domingos<sup>1,2</sup>, Marc Sapene<sup>6</sup>, Francis Martin<sup>7</sup>, Bruno Stach<sup>8</sup>, Yves Grillet<sup>9</sup>, Jean François Muir<sup>4</sup>, Patrick Levy<sup>1,2</sup>, Frederic Series<sup>5</sup>, Jean-Louis Pepin<sup>1,2\*</sup>, on behalf of the Scientific Council of The Sleep Registry of the French Federation of Pneumology (OSFP)<sup>10¶</sup>

**1** HP2 Laboratory INSERM U 1042, University Grenoble Alpes, Grenoble, France, **2** Pôle Locomotion, Rééducation et Physiologie, Hôpital Albert Michallon, Grenoble, France, **3** Research and Development department, AGIRadom, Meylan, France, **4** Pneumology and Respiratory Intensive Care U, Rouen University Hospital, Rouen, France, **5** Institut Universitaire de Pneumologie et Cardiologie de Québec, Université Laval, Québec, Canada, **6** Unité Sommeil et Vigilance, Polyclinique Bordeaux Cauderan, Bordeaux, France, **7** Unité des pathologies du sommeil, Centre hospitalier de Compiègne, Compiègne, France, **8** Pneumologie, Cabinet Médical Saint Michel, Valenciennes, France, **9** Pneumologie, Cabinet Médical, Valence, France, **10** Scientific Council of The Sleep Registry of the French Federation of Pneumology, (FFP), Paris, France

## Abstract

**Rationale:** In obstructive sleep apnea patients (OSA), continuous positive airway pressure (CPAP) adherence is crucial to improve symptoms and cardiometabolic outcomes. The choice of mask may influence CPAP adherence but this issue has never been addressed properly.

**Objective:** To evaluate the impact of nasal pillows, nasal and oronasal masks on CPAP adherence in a cohort of OSA.

**Methods:** Newly CPAP treated OSA participating in “Observatoire Sommeil de la Fédération de Pneumologie”, a French national prospective cohort, were included between March 2009 and December 2011. Anthropometric data, medical history, OSA severity, sleepiness, depressive status, treatment modalities (auto-CPAP versus fixed pressure, pressure level, interface type, use of humidifiers) and CPAP-related side effects were included in multivariate analysis to determine independent variables associated with CPAP adherence.

**Results:** 2311 OSA (age = 57(12) years, apnea+hypopnea index = 41(21)/h, 29% female) were included. Nasal masks, oronasal masks and nasal pillows were used by 62.4, 26.2 and 11.4% of the patients, respectively. In univariate analysis, oronasal masks and nasal pillows were associated with higher risk of CPAP non-adherence. CPAP non-adherence was also associated with younger age, female gender, mild OSA, gastroesophageal reflux, depression status, low effective pressure and CPAP-related side effects. In multivariate analysis, CPAP non-adherence was associated with the use of oronasal masks (OR = 2.0; 95%CI = 1.6; 2.5), depression, low effective pressure, and side effects.

**Conclusion:** As oronasal masks negatively impact on CPAP adherence, a nasal mask should be preferred as the first option. Patients on oronasal masks should be carefully followed.

**Citation:** Borel JC, Tamisier R, Dias-Domingos S, Sapene M, Martin F, et al. (2013) Type of Mask May Impact on Continuous Positive Airway Pressure Adherence in Apneic Patients. PLoS ONE 8(5): e64382. doi:10.1371/journal.pone.0064382

**Editor:** Juan P. de Torres, Clinica Universidad de Navarra, Spain

**Received:** December 27, 2012; **Accepted:** April 12, 2013; **Published:** May 15, 2013

**Copyright:** © 2013 Borel et al. This is an open-access article distributed under the terms of the Creative Commons Attribution License, which permits unrestricted use, distribution, and reproduction in any medium, provided the original author and source are credited.

**Funding:** The Sleep Registry of the French Federation of Pneumology, (FFP); La Haute Autorité de Santé (HAS), Direction Générale de la Santé (DGS); L'Association Nationale pour le Traitement à Domicile de l'Insuffisance Respiratoire (ANTADIR). The funders had no role in study design, data collection and analysis, decision to publish, or preparation of the manuscript.

**Competing Interests:** Dr. Borel is employed by AGIR à dom, a home-care provider delivering CPAP treatment. Dr. Tamisier received grants/payment for lecture and consultant fees from RESMED. Dr. Muir received grants from GSK; board membership fees from Boehringer/General elctrics/breas; payment for lectures from Chiesi and Boehringer; payment for educational presentation from Breas and Boehringer; travel/accomodations from Boehringer, Astra, GSK. Dr. Levy received consultant fees from Resmed, Philips, Fisher-Paykel; grants from Resmed, Philips, Fisher-Paykel and payment for lectures from Resmed and Philips. Dr. Pepin received consultant fees from Resmed, Philips, Fisher-Paykel; grants from Resmed, Philips, Fisher-Paykel and payment for lectures from Resmed and Philips. Mrs. Dias-Domingos, Dr. Sapene, Dr. Martin, Dr. Stach, Dr. Grillet and Dr. Series declare no conflict of interest. This does not alter the authors' adherence to all the PLOS ONE policies on sharing data and materials.

\* E-mail: jpepin@chu-grenoble.fr (JLP); j.borel@agiradom.com (JCB)

¶ Membership of the Scientific Council of The Sleep Registry of the French Federation of Pneumology (OSFP) is provided in the Acknowledgments

## Introduction

Continuous positive airway pressure (CPAP) is the first line therapy for moderate to severe obstructive sleep apnea syndrome (OSAS) [1]. Both randomized controlled studies and observational cohort studies have demonstrated beneficial effects in terms of cardiovascular

[2,3,4,5], metabolic [6], daytime vigilance and quality of life [7] outcomes. However, on a long term basis, 20 to 25% of OSAS patients discontinue CPAP treatment [8,9] although CPAP adherence is crucial to improve symptoms [10] and cardiometabolic outcomes [2,4,11,12] with a dose effect relationship [13,14].

As a consequence, improving CPAP usage in poorly-adherent patients remains a major challenge for physicians and care givers. Many studies have been dedicated to delineate the factors associated with the risk of non-adherence. Factors of different natures are likely to influence CPAP tolerance and adherence: *i*) patients' characteristics (age, psychological factors [15,16], marital and employment status [8]), *ii*) OSAS severity [17] and related symptoms [18,19] as well as *iii*) technical innovations concerning both the device itself or interfaces [20].

Clinicians generally consider that the choice of the interface is crucial, although insufficient, for the success of CPAP treatment. As a first option, nasal masks are the most frequently used interface [21,22]. Oronasal masks, that cover both the nose and mouth, are proposed as a useful alternative in response to sleep-related mouth leaks (pressurized air escaping via the mouth when a nasal mask is used) [21,23,24] and nasal pillows have recently provided the opportunity to reduce mask size [25]. Two recently published case-reports suggest that in subgroups of patients, CPAP may not be effective when an oronasal mask or nasal pillows are used [26,27]. Only very few studies have specifically looked at the impact of different masks types on CPAP adherence. Indeed, in a Cochrane analysis addressing the impact of delivery interfaces on CPAP adherence [22], only 132 patients from four randomized controlled trials were analyzed and no clear conclusions could be made: "Due to the limited number of studies available comparing various interface types, the optimum form of CPAP delivery interface remains unclear". However, small sample size studies have suggested that the type of interface may impact on CPAP tolerance and adherence [25,28]. The objective of this observational study was to evaluate, in a large prospective cohort of unselected OSAS patients, the impact of nasal pillows, and nasal and oronasal masks on CPAP adherence among other covariates (patients' characteristics, sleep apnea severity, others technical aspects of CPAP treatment and side-effects), which are likely to influence CPAP adherence.

## Materials and Methods

### Study Design and Data Source

This is a prospective observational cohort study from the research database of the "Observatoire Sommeil de la Fédération de Pneumologie" (OSFP). This database is a large, well maintained database administered on a not-for-profit basis by the French Federation of Pneumology. It contains anonymized medical records from respiratory physicians in private practice, general hospitals and university hospitals [29]. The OSFP registry is a standardized web-based report including longitudinal data from patients complaining about sleep symptoms and being treated for sleep breathing disorders. Participating staff are trained in the use of computerized medical records and appropriate software. Periodic quality control checks are made to ensure up-to-standard data recording.

Ethical committee approval was obtained by "Le Comité consultatif sur le traitement de l'information en matière de recherche en santé" (C.C.T.I.R.S n° 09.521) and authorization from the "Commission Nationale Informatique et Liberté" (C.N.I.L), the French information technology and personal data protection authority. The OSFP Independent Scientific Advisory Committee approved data use for this study. Patients included in the database gave written informed consent.

**Inclusion criteria.** Between March 2009 and December 2011, adult patients ( $\geq 18$  years old) fulfilling the following criteria were identified in the OSFP database:

- A baseline medical visit reported in the database that included the diagnosis of obstructive sleep apnea syndrome exclusively (i.e: patients with central or mixed apnea syndrome were not selected) and the prescription of CPAP treatment.
- A follow-up medical visit, within a 1 to 24 month window after CPAP prescription, reported in the database. Patients treated with other modalities of pressure therapy such as bi-level positive airway pressure were not selected.

**Outcome measures.** Clinical information collected for the analysis included anthropometry, medical history with cardiometabolic co-morbidities, severity of sleep apnea (established by in-lab attended or unattended polysomnography and respiratory polygraphy (minimum 3 cardiopulmonary channels)), daytime sleepiness (Epworth Sleepiness Scale; ESS) [30], fatigue (Pichot fatigue Scale), depressive status (Pichot depression scale [31]) and treatment modalities (auto-adjusted CPAP versus fixed pressure, pressure level, interface type, use of humidifier). A specific questionnaire targeting CPAP-related side effects was filled-in by each patient. All the data concerning treatment modalities were collected during the follow-up visit. Objective CPAP adherence, reported in hours/night, was obtained from built-in time counters on the CPAP devices over a period of at least one month preceding the follow-up visit. A threshold of four hours of CPAP usage per night was used to separate adherent and non-adherent patients [2,4,10,11,32].

### Exclusion Criteria

Patients were excluded from the analysis when *i*) CPAP adherence was not specified; *ii*) type of interface item was not reported; *iii*) Epworth sleepiness scale (ESS) and/or Pichot fatigue scale and/or Pichot depression scale were not completed. These criteria were applied according to the primary objective of the study and considering that psychological factors [15,16] as well as daytime sleepiness [19] contribute to continuous positive airway pressure adherence.

### Data Management and Statistical Analysis

Data were analyzed using Statistical Analysis System (SAS®) software version 9.1.3 (SAS Institute, Cary, NC, USA). Continuous data were expressed as mean (SD), and categorical data as percentage. Univariate conditional logistic regression models were used to compare all the variables between CPAP adherent and non-adherent patients (threshold 4 h/night). The delay to the follow-up visit was the matching factor (conditional factor): four strata were defined: ]1–6 months], ]6–12 months], ]12–18 months] and ] 18–24 months]. When log-linearity of a continuous variable was not respected, the variable was converted to dichotomous data ( $>$  or  $<$  the median value).

Variables which were associated with the risk of being non-adherent to CPAP in univariate analysis ( $p < 0.10$ ) were included in a multivariable conditional logistic regression model (backward selection). Co-linearity between variables (defined as  $p < 0.2$  and  $r > 0.4$ ) was verified by Pearson's or Spearman's coefficient or Cramer's V2. Missing values were mostly  $\leq 1\%$  of observations except for SpO<sub>2</sub>  $< 90\%$  (expressed in % of recording time) with 15% missing, and depressive status (3%). The missing values were replaced by the variable's median for continuous data and for categorical data by the most frequent value [33].

Finally, a mixed model, adjusted for the mean length of CPAP treatment, was used to compare *i*) the daily adherence, *ii*) the mean CPAP pressure and *iii*) the CPAP-related side effects according to the interface modality (ornasal mask, nasal mask or nasal pillows) Only  $p$ -values  $< 0.05$  were considered statistically significant.

## Results

Figure 1 shows the flow chart of the study. Two thousand three hundred and eleven OSAS patients with complete information regarding symptoms, comorbidities, CPAP technology, interfaces, CPAP adherence and side effects were analyzed. The mean delay between CPAP initiation and the follow-up visit was  $4.5 \pm 3.6$  months. Seventy-seven and nineteen percent of the follow-up visits occurred between 1 to 6 months and 6 to 12 months respectively.

For 2475 patients with OSA in the database, CPAP adherence was not known (2122 patients) or the type of interface was not recorded (353 patients) and they were not included in the analysis. Table 1 shows a comparison between patients who were analyzed versus patients excluded from the analysis. There were some statistically significant differences that actually had no clinical relevance.

### Patients' Characteristics

Table 2 shows patients' characteristics for the group as a whole. Seventy-one percent of the patients were male. The two main comorbidities encountered were hypertension and hypercholesterolemia. Eighty-seven percent of the patients were treated with auto-adjusted CPAP and 78.8% were adherent to CPAP (mean compliance  $\geq 4$  hours/night) at the follow-up visit.

### Factors Associated with Risk of CPAP Non-adherence in Univariate Analysis

Tables 3 and 4 display the variables according to CPAP adherence status. Factors associated with the risk of being non-adherent to CPAP can be arbitrarily separated into three domains: i) general patient characteristics (Table 3), ii) sleep apnea severity (Table 4), iii) technical aspects of CPAP treatment, delivery interfaces and side-effects (Table 4). Regarding the technical aspects of CPAP treatment, and particularly the types of interface, both oronasal masks and nasal-pillows were associated with a higher risk of non-adherence compared to a nasal mask (Figure 2a).

Interestingly, the lower the effective pressure level, the higher the risk of non-adherence. Oronasal masks were associated with higher pressure levels than both nasal masks and nasal-pillows (Figure 2b) (mixed model analysis). Finally, among CPAP-related

**Table 1.** Comparison between patients included in the analysis and patients excluded because of missing adherence or type of mask data.

|                                           | Included<br>n = 2 311 | Excluded<br>n = 2 475 | P-value |
|-------------------------------------------|-----------------------|-----------------------|---------|
| <b>Anthropometrics</b>                    |                       |                       |         |
| Age, Years                                | 57.26 $\pm$ 12.21     | 58.40 $\pm$ 12.44     | 0.0016  |
| BMI, kg/m <sup>2</sup>                    | 32.16 $\pm$ 6.58      | 31.80 $\pm$ 6.85      | 0.0142  |
| Gender, % female                          | 29.0                  | 26.5                  | 0.0461  |
| Current smokers, %                        | 15.4                  | 16.2                  | 0.4728  |
| <b>Sleep apnea characteristics</b>        |                       |                       |         |
| Apnea-hypopnea index, events/hour         | 40.65 $\pm$ 20.55     | 40.53 $\pm$ 20.96     | 0.9586  |
| Depression, Fatigue and sleepiness scales |                       |                       |         |
| Pichot Depression score                   | 4.5 $\pm$ 3.8         | 4.3 $\pm$ 3.9         | 0.1004  |
| Pichot Fatigue score                      | 14.0 $\pm$ 8.2        | 14.0 $\pm$ 8.2        | 0.9033  |
| Epworth sleepiness score                  | 10.6 $\pm$ 5.1        | 10.9 $\pm$ 5.1        | 0.0476  |

doi:10.1371/journal.pone.0064382.t001

side-effects, nasal congestion, dry mouth, choking sensation under CPAP and psychologically perceived inconvenience, were associated with a higher risk of non-adherence. As shown in Figure 3, the proportion of patients reporting side-effects was significantly larger with oronasal masks than with nasal masks (using a mixed model, adjusted for the mean length of CPAP treatment).

Regarding general patient characteristics (Table 3) and sleep apnea severity (Table 4), the risk of being non-adherent to CPAP was increased for females and younger patients. Similarly, the higher scores of depression and fatigue were associated with a greater risk of non-adherence. The presence of gastroesophageal reflux also increased the risk of non-adherence. In contrast, most severe sleep apnea syndromes, objectively recognized by the Apnea-hypopnea Index and time spent with a nocturnal SpO<sub>2</sub><90%, were associated with a lower risk of non-adherence to CPAP.

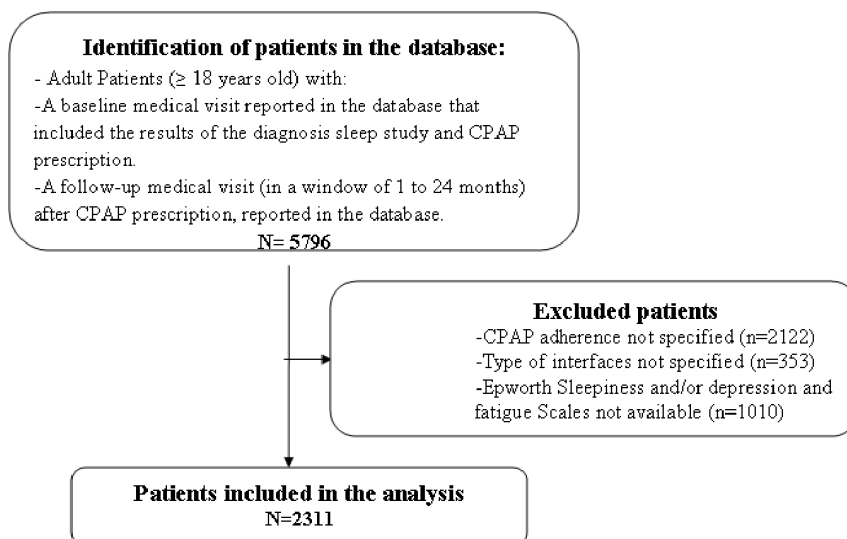

**Figure 1. Flow Chart of the study.**

doi:10.1371/journal.pone.0064382.g001

**Table 2.** Patients' characteristics (n = 2311).

| <b>Anthropometrics</b>                     |             |
|--------------------------------------------|-------------|
| Age, years                                 | 57.26±12.21 |
| BMI, kg/m <sup>2</sup>                     | 32.16±6.58  |
| Gender, % female                           | 29.0        |
| Active smokers, %                          | 15.4        |
| <b>Medical History</b>                     |             |
| COPD, %                                    | 5.00        |
| Hypertension, %                            | 48.10       |
| Myocardial infarction, %                   | 4.00        |
| Coronary artery disease, %                 | 6.00        |
| Heart failure, %                           | 2.70        |
| Arrhythmias, %                             | 8.70        |
| Stroke, %                                  | 3.00        |
| Gastroesophageal reflux, %                 | 20.90       |
| Diabetes, %                                | 17.20       |
| Hypercholesterolemia, %                    | 33.50       |
| Hypertriglyceridemia, %                    | 8.20        |
| Depression, %                              | 15.30       |
| <b>Sleep apnea severity</b>                |             |
| Apnea-hypopnea index, events/hour          | 40.65±20.55 |
| SpO <sub>2</sub> <90%, % of recording time | 16.32±19.72 |
| Epworth Sleepiness score                   | 10.6±5.1    |
| <b>Characteristics of CPAP treatment</b>   |             |
| CPAP use, hours/night                      | 5.39±1.92   |
| Patients with ≥4 hours/night, %            | 78.8        |
| CPAP modality, % auto-adjusted pressure    | 86.90       |
| Type of interface, %                       |             |
| Nasal                                      | 62.40       |
| Oronasal                                   | 26.20       |
| Nasal Pillows                              | 11.40       |
| Additional heated Humidification (%)       | 31.40       |

doi:10.1371/journal.pone.0064382.t002

### Factors Associated with Risk of CPAP Non-adherence in Multivariate Analysis

The following variables were included in the multivariate analysis: age, Pichot fatigue and depression scores, SpO<sub>2</sub><90% (% of recording time), effective pressure level, gender, gastroesophageal reflux, type of interface, nasal congestion, dry mouth, choking sensation under CPAP, psychologically perceived inconvenience. Although the Pichot fatigue score and depression score were collinear variables, both were included in the multivariate model in view of their respective clinical relevance. Nasal congestion and a choking sensation under CPAP were also both included in the model for the same reason (clinical relevance). Figure 4 displays variables associated with the risk of being non-adherent to CPAP in a multivariable conditional logistic regression model.

Regarding the technical aspects of CPAP treatment and CPAP-related side effects, the type of interface (oronasal mask compared to nasal mask), a low effective pressure level, choking sensation under CPAP and psychologically perceived inconvenience were associated with a higher risk of non-adherence. Among general patient characteristics, depressive status remained the only independent factor associated with an increased risk of non-adherence.

### Discussion

The main objective of this prospective cohort study was to evaluate the impact of different interfaces on CPAP adherence among other potentially confounding variables. The results can be summarized as follows: (i) In univariate analysis, multiple factors were identified as linked to CPAP non-adherence (ii) in multivariate analysis, the type of interface, depressive status, a low effective pressure, a choking sensation when wearing CPAP and psychologically perceived inconvenience related to CPAP treatment were independently associated with a higher risk of CPAP non-adherence. (iii) The oronasal mask was associated with a lower adherence than nasal masks and required higher pressure levels than both nasal masks and nasal-pillows.

Methodological considerations related to the study design should be discussed: Firstly, in a national registry such as this, we cannot guarantee that the same care and medical attention

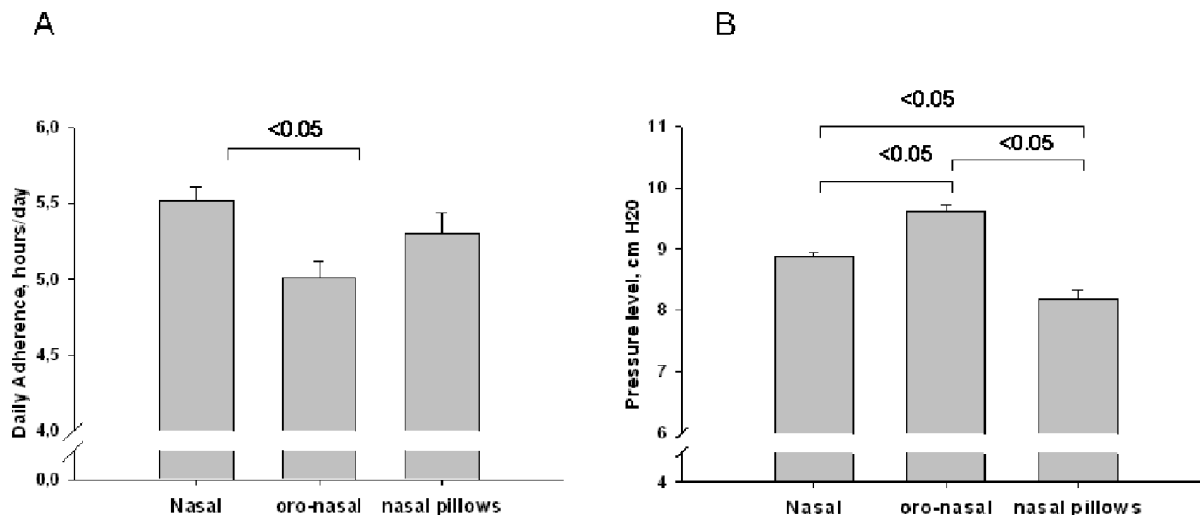**Figure 2. Adherence (a) and positive airway pressure level (b) according to the type of interface.**

doi:10.1371/journal.pone.0064382.g002

**Table 3.** General patient characteristics according to CPAP adherence status and risks of being non-adherent (univariate analysis).

|                                                  | CPAP adherence<br><4 h/night<br>n = 491 | CPAP adherence<br>≥4 h/night<br>n = 1820 | Odds Ratio | 95% CI          | P-value    |
|--------------------------------------------------|-----------------------------------------|------------------------------------------|------------|-----------------|------------|
| <b>Antropometrics</b>                            |                                         |                                          |            |                 |            |
| Age, Years                                       | 56.07±12.31                             | 57.58±12.17                              | 0.990      | [0.982; 0.998]  | 0.0194     |
| BMI (≥31.10 vs <31.10), kg/m <sup>2</sup>        | 31.76±6.34                              | 32.27±6.64                               | 1.011      | [0.828; 1.234]  | 0.7202     |
| Gender, % female (male vs female)                | 32.8                                    | 28.0                                     | 0.802      | [0.647; 0.994]  | 0.0442     |
| Current smokers, %                               | 18.10                                   | 14.70                                    | 1.281      | [0.984; 1.668]  | 0.0658     |
| <b>Medical History</b>                           |                                         |                                          |            |                 |            |
| COPD, %                                          | 6.30                                    | 4.60                                     | 1.414      | [0.924; 2.162]  | 0.1103     |
| Hypertension, %                                  | 46.40                                   | 48.50                                    | 0.928      | [0.760; 1.134]  | 0.4656     |
| Myocardial infarction, %                         | 3.70                                    | 4.10                                     | 0.925      | [0.547; 1.566]  | 0.7720     |
| Coronary artery disease, %                       | 6.50                                    | 5.90                                     | 1.140      | [0.757; 1.716]  | 0.5313     |
| Heart failure, %                                 | 2.90                                    | 2.70                                     | 1.073      | [0.587; 1.961]  | 0.8185     |
| Arrhythmias, %                                   | 7.10                                    | 9.10                                     | 0.772      | [0.528; 1.127]  | 0.1801     |
| Stroke, %                                        | 3.50                                    | 2.90                                     | 1.214      | [0.696; 2.119]  | 0.4947     |
| Gastroesophageal reflux, %                       | 24.80                                   | 19.90                                    | 1.345      | [1.063; 1.702]  | 0.0135     |
| Diabetes, %                                      | 18.30                                   | 16.90                                    | 1.102      | [0.850; 1.429]  | 0.7022     |
| Hypercholesterolemia, %                          | 32.20                                   | 33.90                                    | 0.930      | [0.751; 1.1150] | 0.5018     |
| Hypertriglyceridemia, %                          | 9.00                                    | 8.00                                     | 1.168      | [0.820; 1.663]  | 0.3908     |
| Upper airway surgery for snoring, %              | 2.04                                    | 2.16                                     | 0.914      | [0.454; 1.841]  | p = 0.8012 |
| <b>Depression, Fatigue and sleepiness scales</b> |                                         |                                          |            |                 |            |
| Pichot Depression score                          | 5.08±4.00                               | 4.33±3.78                                | 1.051      | [1.025; 1.078]  | 0.0001     |
| Pichot Fatigue score (≥14.00 vs <14.00)          | 14.93±8.51                              | 13.79±8.17                               | 1.398      | [1.143; 1.711]  | 0.0011     |
| Epworth sleepiness score (≥or <10)               | 10.85±5.07                              | 10.54±5.10                               | 1.191      | [0.972; 1.459]  | 0.0917     |

doi:10.1371/journal.pone.0064382.t003

were provided in all participating centres. This is a common concern for many prospective observational cohorts [2,3]. For this reason, large sample sizes are required to diminish the impact of such limitations. Secondly, there were some statistically significant differences between patients included in the analysis versus patients excluded. Although these differences are not likely to be clinically relevant, this limits the generalizability of our findings.

Our study is the first to suggest an influence of the type of mask on CPAP adherence in a large prospective unselected cohort of OSA patients. This is corroborated by unpublished data from the observatory of “Association Nationale pour le Traitement à Domicile de l’Insuffisance Respiratoire” (ANTADIR, <http://www.antadir.com/>), a federation of non-profit French regional associations delivering home CPAP treatment [34], which has recently collected data from 5892 OSA patients treated with CPAP for 5 to 12 months and has found that CPAP adherence was significantly lower in patients using facial masks (oronasal) than patients using nasal masks (5.1(2.3) versus 5.7(2.2) hour/night  $p < 0.0001$ ). These data however were not controlled for confounders. Previously, only one small ( $n = 20$ ) randomized control study [28] has suggested that patients using an oronasal mask exhibited a lower adherence than those equipped with a nasal mask after 1-month of follow-up. In contrast, the three other randomized control studies, performed with a short-term follow-up (3 to 8 weeks) in CPAP-naïve patients, failed to demonstrate any significant impact of type of mask on CPAP adherence [25,35,36]. Two of these four studies [35,36] compared a nasal mask versus an intraoral mask (this latter type of mask was not

represented in our study), and these studies suggested that the type of interface did not influence CPAP adherence in highly selected patients. In our prospective cohort of unselected patients, corresponding to real life, nasal masks are often the first line of interface used and other types of masks are principally considered to counteract adverse effects such as mouth leaks or nasal intolerance [22]. Thus, the significant influence of the type of mask on CPAP adherence found in the present study may be partly explained by the fact that the reasons to start with nasal, oronasal or pillows and the history of different masks used by the patient before the follow-up visit were not available. It could be argued that oronasal masks were more frequently used as second intention masks reflecting a difficult initiation to CPAP treatment. However, the present results show that the proportion of side-effects was significantly larger with oronasal masks than with nasal masks. As a consequence, our results demonstrate that if an oronasal mask was only proposed in second intention to problematic patients (with poor adherence to nasal CPAP and/or with side effects), then, the oronasal mask neither adequately resolved the problem of adherence nor the problem of side effects. Mouth dryness owing to mouth leaks is one of the more frequent side effects reported by the patients. These mouth-leaks are also inter-related with nasal congestion and have been related to poor compliance [24]. Indeed, Bachour et al [23] have compared two groups of apneic patients, free of nasal symptoms, during an attended polysomnography without CPAP. One group of patients spent more than 70% of their total sleep time in mouth breathing (considered as “mouth breathers”) and the other group spent less than

**Table 4.** Sleep breathing disorders severity, technical aspects of CPAP treatment and side-effects according to CPAP adherence status and risks of being non-adherent (univariate analysis).

|                                            | CPAP adherence<br><4 h/night<br>n = 491 | CPAP adherence<br>≥4 h/night<br>n = 1820 | Odds Ratio   | 95% CI         | P-value |
|--------------------------------------------|-----------------------------------------|------------------------------------------|--------------|----------------|---------|
| <b>Sleep apnea characteristics</b>         |                                         |                                          |              |                |         |
| Apnea-hypopnea index, events/hour          | 37.76±19.61                             | 41.43±20.73                              | 0.991        | [0.986; 0.996] | 0.0007  |
| SpO2<90%, % of recording time              | 14.07±18.42                             | 16.91±20.02                              | 0.992        | [0.986; 0.998] | 0.0143  |
| <b>Technical aspects of CPAP treatment</b> |                                         |                                          |              |                |         |
| CPAP treatment modalities                  |                                         |                                          |              |                |         |
| auto-adjusted pressure vs constant, %      | 88.20                                   | 86.50                                    | 1.160        | [0.854; 1.574] | 0.3415  |
| Additional heated Humidification, %        | 31.40                                   | 31.40                                    | 0.989        | [0.798; 1.227] | 0.9219  |
| Type of interface, % (nasal as reference)  |                                         |                                          |              |                |         |
| Nasal                                      | 50.30                                   | 65.70                                    | Overall test |                | <0.0001 |
| Oronasal                                   | 37.30                                   | 23.20                                    | 2.090        | [1.676; 2.608] | <0.0001 |
| Nasal pillows                              | 12.40                                   | 11.10                                    | 1.439        | [1.047; 1.978] | 0.0249  |
| Effective pressure level (≥9 vs <9 cmH2O)  | 8.64±2.44                               | 9.09±2.38                                | 0.768        | [0.623; 0.946] | 0.0013  |
| <b>CPAP-related side-effects</b>           |                                         |                                          |              |                |         |
| Nasal Congestion, %                        | 15.90                                   | 11.20                                    | 1.485        | [1.119; 1.970] | 0.0061  |
| Ocular irritation, %                       | 8.10                                    | 6.40                                     | 1.301        | [0.895; 1.892] | 0.1677  |
| Dry mouth, %                               | 33.40                                   | 23.20                                    | 1.650        | [1.328; 2.050] | <0.0001 |
| Choking sensation under CPAP, %            | 23.60                                   | 6.30                                     | 4.603        | [3.472; 6.102] | <0.0001 |
| Headaches, %                               | 3.50                                    | 3.10                                     | 1.115        | [0.643; 1.935] | 0.6984  |
| Psychologically perceived inconvenience, % | 28.50                                   | 10.50                                    | 3.403        | [2.658; 4.357] | <0.0001 |
| Family tolerance, %                        | 7.30                                    | 7.40                                     | 1.000        | [0.682; 1.466] | 0.9993  |
| Aerophagia, %                              | 4.30                                    | 3.80                                     | 1.116        | [0.678; 1.837] | 0.6669  |

doi:10.1371/journal.pone.0064382.t004

30% in mouth breathing (“nasal breathers”). “Mouth breathers” when treated exhibited a lower adherence to nasal-CPAP than “nasal breathers” after three months and one year of follow up. Oronasal masks have been designed to overcome this problem of mouth

leaks and therefore potentially improve CPAP adherence. Nevertheless, because of greater difficulties in fitting [37] or higher probability of displacement during sleep, several recent studies have shown that non-intentional leaks remained more

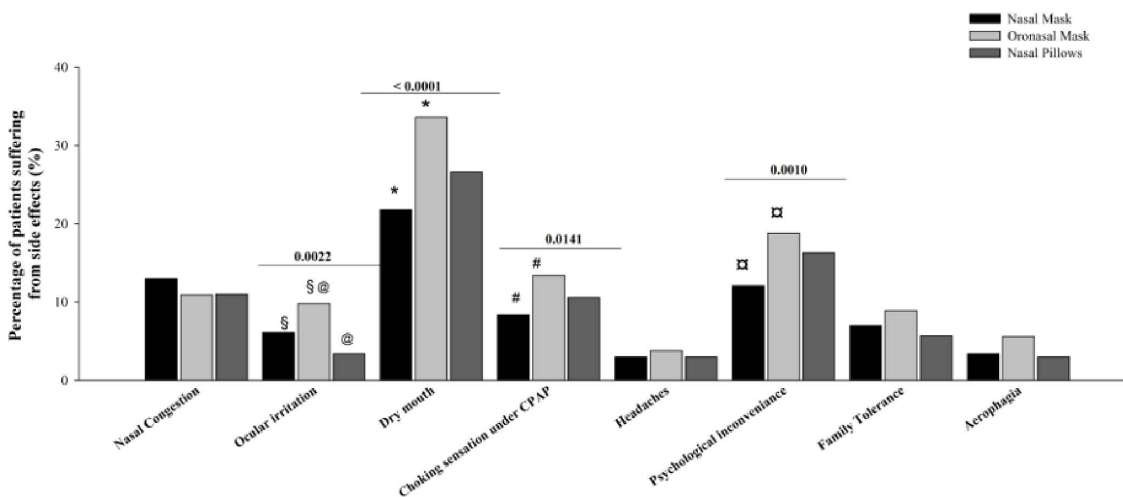

**Figure 3.** Percentage of side effects according to the type of mask. -for ocular irritation § = difference between nasal mask and oronasal mask with p=0.049; @ = difference between oronasal mask and nasal pillows with p=0.062. -for dry mouth: \* = difference between nasal mask and oronasal mask with p<0.0001. -for Choking sensation under CPAP: # = difference between nasal mask and oronasal mask with p=0.0024. - for psychologically perceived inconvenience: □ = difference between nasal mask and oronasal mask with p=0.0001. doi:10.1371/journal.pone.0064382.g003

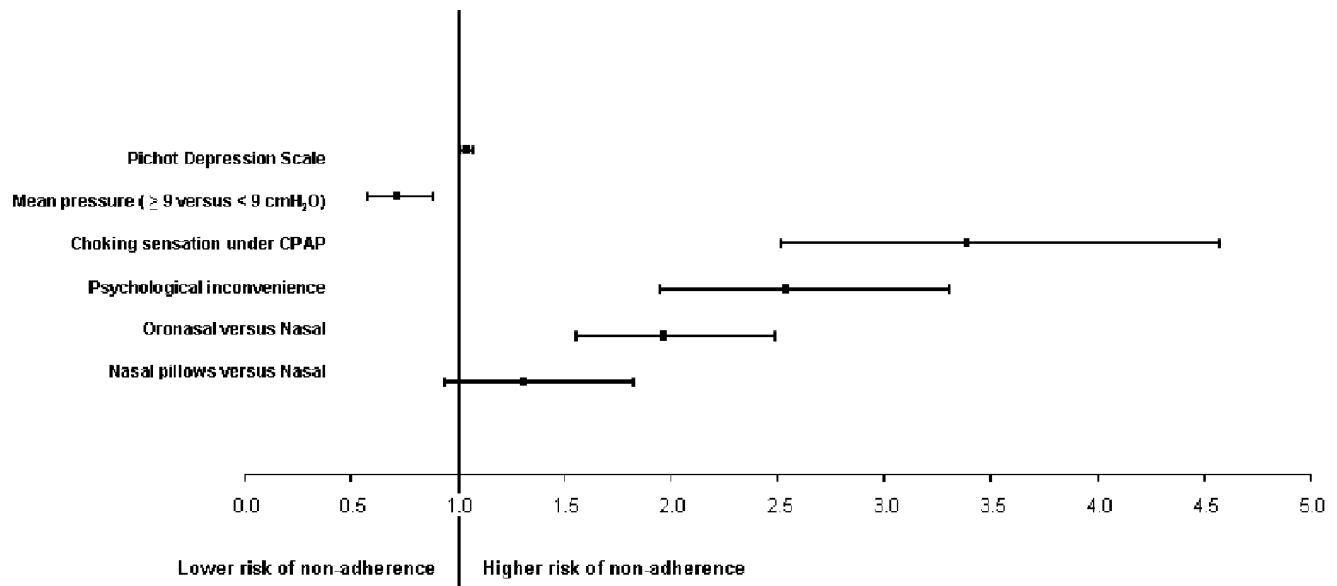

**Figure 4. Variables associated with the risk of being non-adherent to CPAP in a multivariable conditional logistic regression model.**  
doi:10.1371/journal.pone.0064382.g004

frequent with oronasal mask than with nasal masks [37,38,39]. Regardless of the type of interface, these leaks have been shown as being associated with a higher risk of non-adherence [40]. Furthermore, we have recently demonstrated that wearing oronasal masks is associated with an increase in upper airway resistance [41] due to the posterior displacement of the tongue and may lead to higher residual respiratory events than nasal masks [37,38]. This may contribute to a lack of clinical benefit and as a consequence further reduce CPAP adherence. In line with the increase in upper airway resistance induced by oronasal masks, we demonstrated that oronasal masks were associated with higher therapeutic pressure than nasal masks in the present study. This is in accordance with Ebben et al. [39]. We could speculate that a higher CPAP pressure is required to counteract the posterior displacement of the mandibular induced by an oronasal mask (i.e. constraint on the chin and traction of straps) and high pressure levels may in turn increase the risk of unintentional leaks. It is important to note that our results show that a low effective pressure level was associated with a higher risk of non-adherence. This is in accordance with Kohler et al [17] who have previously shown that higher CPAP pressure and greater apnea severity were associated with a higher probability to pursue CPAP treatment (in univariate analysis). Similarly, Valentin et al [40] also found that non-adherent patients were being treated with lower pressure than adherent patients. Taken together, these findings imply that the side-effects rather than the effective pressure level itself contribute to CPAP non-adherence.

The type of interface was not the single factor that influenced CPAP adherence. Depressive status and psychologically perceived inconvenience contributed to modulate this adherence. Gagnadoux et al [8], in a prospective cohort, failed to demonstrate a link between depressive status and adherence. Furthermore, Poulet et al [15] showed that adherent patients tended to have a worse depression score. This contrast between our results and these previous studies highlights the need of large scale studies focusing on the influence of psychological factors. Moreover, it also underscores the need to pursue interventions that could help patients to overcome barriers such as psychologically perceived inconvenience and to improve active coping processes. Educa-

tional programs are important but difficult to implement and to achieve, and need experienced care givers. Finally, in line with a previous study [8,17], our study failed to demonstrate that sleepiness was associated with CPAP adherence. One could argue that the mean Epworth score was low and thus represented a selection bias. However, this score was in accordance with the mean ESS value previously reported in the ESADA cohort [42].

Our study is important as it proposes a very simple and probably important clinical message; that the use of oronasal masks should be restricted to cases of documented nasal mask failure. In term of costs, it should also be noted that the price of an oronasal mask is two to three-fold the price of a nasal mask and proper indications may lead to significant cost reductions. Better definition of the appropriate indications for each type of interface would also lead to substantial reductions in CPAP-related costs.

## Conclusions

The present study is the first to suggest an influence of the type of mask on CPAP adherence in a large cohort of OSA patients. Compared to nasal masks, oronasal masks increased the risk of being non-adherent. A large scale randomized controlled study is required to confirm these results. However, as oronasal masks may negatively impact on CPAP adherence, a nasal mask should be preferred as the first option when initiating CPAP treatment. Patients on oronasal masks should be carefully followed. Finally, new strategies such as the combination of a nasal mask and mandibular advancement device [41,43] should be tested in a randomized controlled trial in patients presenting excessive mouth leaks with nasal CPAP.

## Acknowledgments

The authors thank Mrs Line Mounier and Mr D Leclercq, who analyzed the data of the regional associations of the ANTADIR observatory (AADAIIRC (Rocheffort), ADIRAL (Nancy/Dijon), ADIR Assistance (Rouen), AGIR à DOM (Grenoble), AIR Basse Normandie (Caen), ALISEO (Nantes/Angers), ARAIRCHAR (Reims), SADIR Assistance (Toulouse), SANTELYS (Lille)). Dr Alison Foote for English editing.

Members of the scientific council of The Sleep registry of the French Federation of Pneumology:

Jean Louis Pepin<sup>1,2</sup>, Yves Grillet<sup>3</sup>, Marc Sapene<sup>4</sup>, Francis Martin<sup>5</sup>, Bruno Housset<sup>6</sup>, Hervé Pegliasco<sup>7</sup>

1 HP2 Laboratory INSERM U 1042, University Grenoble Alpes, Grenoble, France,

2 Pôle Locomotion, Rééducation et Physiologie, Hôpital Albert Michallon, Grenoble, France,

3 Pneumologie, Cabinet Médical, Valence, France,

4 Unité Sommeil et Vigilance, Polyclinique Bordeaux Cauderan, Bordeaux, France,

5 Unité des pathologies du sommeil, Centre hospitalier de Compiègne, Compiègne, France,

6 Service de pneumologie et de pathologie professionnelle, CHI de Créteil, Créteil, France,

7 Pneumologie, Hôpital Ambroise Pare, Marseille, France

## Author Contributions

Conceived and designed the experiments: JCB JLP. Analyzed the data: JCB RT SDD JLP. Contributed reagents/materials/analysis tools: MS FM BS YG JFM. Wrote the paper: JCB FS PL JLP.

## References

- Sullivan CE, Issa FG, Berthon-Jones M, Eves L (1981) Reversal of obstructive sleep apnoea by continuous positive airway pressure applied through the nares. *Lancet* 1: 862–865.
- Marin JM, Agustí A, Villar I, Forner M, Nieto D, et al. (2012) Association between treated and untreated obstructive sleep apnea and risk of hypertension. *Jama* 307: 2169–2176.
- Marin JM, Carrizo SJ, Vicente E, Agustí AG (2005) Long-term cardiovascular outcomes in men with obstructive sleep apnoea-hypopnoea with or without treatment with continuous positive airway pressure: an observational study. *Lancet* 365: 1046–1053.
- Pepin JL, Tamisier R, Barone-Rochette G, Launois SH, Levy P, et al. (2010) Comparison of continuous positive airway pressure and valsartan in hypertensive patients with sleep apnea. *Am J Respir Crit Care Med* 182: 954–960.
- Pepperell JC, Ramdasingsh-Dow S, Crosthwaite N, Mullins R, Jenkinson C, et al. (2002) Ambulatory blood pressure after therapeutic and subtherapeutic nasal continuous positive airway pressure for obstructive sleep apnoea: a randomised parallel trial. *Lancet* 359: 204–210.
- Sharma SK, Agrawal S, Damodaran D, Sreenivas V, Kadhiravan T, et al. (2011) CPAP for the metabolic syndrome in patients with obstructive sleep apnea. *N Engl J Med* 365: 2277–2286.
- Giles TL, Lasserson TJ, Smith BH, White J, Wright J, et al. (2006) Continuous positive airways pressure for obstructive sleep apnoea in adults. *Cochrane Database Syst Rev*: CD001106.
- Gagnadoux F, Le Vaillant M, Goupil F, Pigeanne T, Chollet S, et al. (2011) Influence of marital status and employment status on long-term adherence with continuous positive airway pressure in sleep apnea patients. *PLoS One* 6: e22503.
- Veale D, Chailleux E, Hoorelbeke-Ramon A, Reybet-Degas O, Humeau-Chapuis MP, et al. (2000) Mortality of sleep apnoea patients treated by nasal continuous positive airway pressure registered in the ANTADIR observatory. Association Nationale pour le Traitement A Domicile de l'Insuffisance Respiratoire chronique. *Eur Respir J* 15: 326–331.
- Weaver TE, Maislin G, Dinges DF, Bloxham T, George CF, et al. (2007) Relationship between hours of CPAP use and achieving normal levels of sleepiness and daily functioning. *Sleep* 30: 711–719.
- Barbe F, Duran-Cantolla J, Capote F, de la Pena M, Chiner E, et al. (2010) Long-term effect of continuous positive airway pressure in hypertensive patients with sleep apnea. *Am J Respir Crit Care Med* 181: 718–726.
- Rossi VA, Stoewhas AC, Camen G, Steffel J, Bloch KE, et al. (2012) The effects of continuous positive airway pressure therapy withdrawal on cardiac repolarization: data from a randomized controlled trial. *Eur Heart J* 33: 2206–2212.
- Antic NA, Catcheside P, Buchan C, Hensley M, Naughton MT, et al. (2011) The effect of CPAP in normalizing daytime sleepiness, quality of life, and neurocognitive function in patients with moderate to severe OSA. *Sleep* 34: 111–119.
- Haentjens P, Van Meerhaeghe A, Moscariello A, De Weerd S, Poppe K, et al. (2007) The impact of continuous positive airway pressure on blood pressure in patients with obstructive sleep apnea syndrome: evidence from a meta-analysis of placebo-controlled randomized trials. *Arch Intern Med* 167: 757–764.
- Poulet C, Veale D, Arnol N, Levy P, Pepin JL, et al. (2009) Psychological variables as predictors of adherence to treatment by continuous positive airway pressure. *Sleep Med* 10: 993–999.
- Wild MR, Engleman HM, Douglas NJ, Espie CA (2004) Can psychological factors help us to determine adherence to CPAP? A prospective study. *Eur Respir J* 24: 461–465.
- Kohler M, Smith D, Tippet V, Stradling JR (2010) Predictors of long-term compliance with continuous positive airway pressure. *Thorax* 65: 829–832.
- Lindberg E, Berne C, Elmasry A, Hedner J, Janson C (2006) CPAP treatment of a population-based sample—what are the benefits and the treatment compliance? *Sleep Med* 7: 553–560.
- Pepin JL, Muir JF, Gentina T, Dauvilliers Y, Tamisier R, et al. (2009) Pressure reduction during exhalation in sleep apnea patients treated by continuous positive airway pressure. *Chest* 136: 490–497.
- Smith I, Lasserson TJ (2009) Pressure modification for improving usage of continuous positive airway pressure machines in adults with obstructive sleep apnoea. *Cochrane Database Syst Rev*: CD003531.
- Beecroft J, Zanon S, Lukic D, Hanly P (2003) Oral continuous positive airway pressure for sleep apnea: effectiveness, patient preference, and adherence. *Chest* 124: 2200–2208.
- Chai CL, Pathinathan A, Smith B (2006) Continuous positive airway pressure delivery interfaces for obstructive sleep apnoea. *Cochrane Database Syst Rev*: CD005308.
- Bachour A, Maasilta P (2004) Mouth breathing compromises adherence to nasal continuous positive airway pressure therapy. *Chest* 126: 1248–1254.
- Baltzan MA, Elkholi O, Wolkove N (2009) Evidence of interrelated side effects with reduced compliance in patients treated with nasal continuous positive airway pressure. *Sleep Med* 10: 198–205.
- Massie CA, Hart RW (2003) Clinical outcomes related to interface type in patients with obstructive sleep apnoea/hypopnea syndrome who are using continuous positive airway pressure. *Chest* 123: 1112–1118.
- Belge C, Delguste P, Mouchart F, Rodenstein D, Mwenge B (2012) Obstructive apneas during continuous positive airway pressure: unexpected finding with nasal pillow interface. *Am J Respir Crit Care Med* 185: 112–114.
- Schorr F, Genta PR, Gregório MG, Danzi-Soares NJ, Lorenzi-Filho G (2012) Continuous positive airway pressure delivered by oronasal mask may not be effective for obstructive sleep apnoea. *Eur Respir J* 40: 503–505.
- Mortimore IL, Whittle AT, Douglas NJ (1998) Comparison of nose and face mask CPAP therapy for sleep apnoea. *Thorax* 53: 290–292.
- OSFP website. Available: <http://www.osfp.fr/portail/>. (Date of consultation: 2012/07/20).
- Johns MW (1991) A new method for measuring daytime sleepiness: the Epworth sleepiness scale. *Sleep* 14: 540–545.
- Guelfi JD (1988) Standardized clinical evaluation of depressive and anxious symptomatology. *Clin Neuropharmacol* 11 Suppl 2: S59–68.
- Barbe F, Duran-Cantolla J, Sanchez-de-la-Torre M, Martinez-Alonso M, Carmona C, et al. (2012) Effect of continuous positive airway pressure on the incidence of hypertension and cardiovascular events in nonsleepy patients with obstructive sleep apnea: a randomized controlled trial. *Jama* 307: 2161–2168.
- Wang H (2003) Imputation in Clinical Research. *Encyclopedia of Biopharmaceutical Statistics*. DOI: 10.1081/E-EBS 120007637.
- Laaban JP, Mounier L, Roque d'Orbecastel O, Veale D, Blacher J, et al. (2010) Cardiovascular risk factors in men and women with obstructive sleep apnoea syndrome. *Respir Med* 104: 1063–1068.
- Anderson FE, Kingshott RN, Taylor DR, Jones DR, Kline LR, et al. (2003) A randomized crossover efficacy trial of oral CPAP (Oracle) compared with nasal CPAP in the management of obstructive sleep apnea. *Sleep* 26: 721–726.
- Khanna R, Kline LR (2003) A prospective 8 week trial of nasal interfaces vs. a novel oral interface (Oracle) for treatment of obstructive sleep apnea hypopnea syndrome. *Sleep Med* 4: 333–338.
- Teo M, Amis T, Lee S, Falland K, Lambert S, et al. (2011) Equivalence of nasal and oronasal masks during initial CPAP titration for obstructive sleep apnea syndrome. *Sleep* 34: 951–955.
- Bakker JP, Neill AM, Campbell AJ (2012) Nasal versus oronasal continuous positive airway pressure masks for obstructive sleep apnea: a pilot investigation of pressure requirement, residual disease, and leak. *Sleep Breath* 16: 709–716.
- Ebber MR, Oyegbile T, Pollak CP (2012) The efficacy of three different mask styles on a PAP titration night. *Sleep Med* 13: 645–649.
- Valentin A, Subramanian S, Quan SF, Berry RB, Parthasarathy S (2011) Air leak is associated with poor adherence to autoPAP therapy. *Sleep* 34: 801–806.
- Borel JC, Gakwaya S, Masse JF, Melo-Silva CA, Series F (2012) Impact of CPAP interface and mandibular advancement device on upper airway mechanical properties assessed with phrenic nerve stimulation in sleep apnea patients. *Respir Physiol Neurobiol* 183: 170–176.
- Hedner J, Grote L, Bonsignore M, McNicholas W, Lavie P, et al. (2011) The European Sleep Apnoea Database (ESADA): report from 22 European sleep laboratories. *Eur Respir J* 38: 635–642.
- El-Solh AA, Moithecnazima B, Akinnusi ME, Churder PM, Laforama AM (2011) Combined oral appliance and positive airway pressure therapy for obstructive sleep apnea: a pilot study. *Sleep Breath* 15: 203–208.
